# Supplementary material for: Derivatives of 5-nitro-1,2,3-2H-triazole – high performance energetic materials
Source: Royal Society of Chemistry journal article supplement (doi:10.1039/c2ta00136e), 2012-10-23
Supplement: c2ta00136e.pdf [file c2ta00136e.pdf]

# Derivatives of 5-Nitro-1,2,3-2H-triazole – High Performance Energetic Materials

Yanqiang Zhang<sup>a</sup>, Damon A. Parrish<sup>b</sup> and Jean'ne M. Shreeve\*<sup>a</sup>

<sup>a</sup> Dr. Y. Zhang, Prof. Dr. J. M. Shreeve  
Department of Chemistry, University of Idaho  
Moscow, ID 83844-2343 (USA)  
Fax: (+1) 208-885-9146  
E-mail: [jshreeve@uidhaho.edu](mailto:jshreeve@uidhaho.edu)

<sup>b</sup> Dr. D. A. Parrish  
Naval Research Laboratory, Code 6030  
Washington, D.C. 20375-5001 (USA)

## Computational Data

S-1 - Scheme 1s. Isodesmic reactions for the derivatives of 5-nitro-1,2,3-2H-triazole and 3,5-dinitro-1,2,4-1H-triazole.

S-2 - Table 1s. Calculated (MP2/6-311++G\*\* // B3LYP/6-31+G\*\*) total energy ( $E_0$ ), zero-point energy (ZPE), values of thermal correction ( $H_T$ ), and heats of formation (HoF) of the derivatives of 5-nitro-1,2,3-2H-triazole and 3,5-dinitro-1,2,4-1H-triazole.

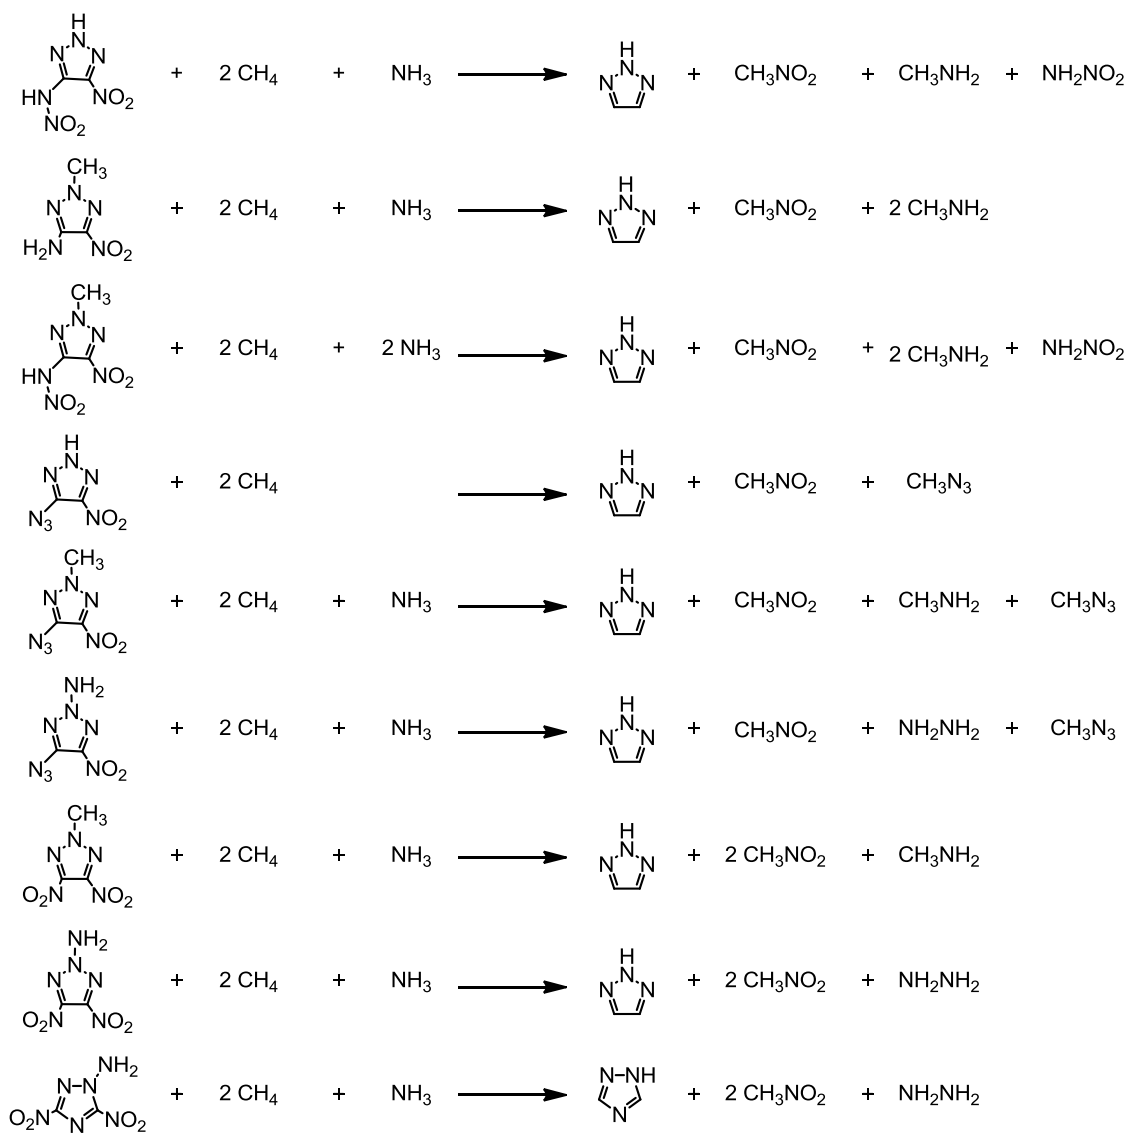

S-1 - Scheme 1s. Isodesmic reactions for the derivatives of 5-nitro-1,2,3-2H-triazole and 3,5-dinitro-1,2,4-1H-triazole.

S-2 - Table 1s. Calculated (MP2/6-311++G\*\* // B3LYP/6-31+G\*\*) total energy ( $E_0$ ), zero-point energy (ZPE), values of thermal correction ( $H_T$ ), and heats of formation (HoF, gas phase) of the derivatives of 5-nitro-1,2,3-2H-triazole and 3,5-dinitro-1,2,4-1H-triazole.

| Name                                           | $E_0$<br>[Hartree/Particle] | ZPE<br>[Hartree/Particle] | $H_T$<br>[Hartree/Particle] | HoF<br>[kJ/mol]      |
|------------------------------------------------|-----------------------------|---------------------------|-----------------------------|----------------------|
| NH <sub>2</sub> NO <sub>2</sub>                | -260.4931748                | 0.039257                  | 0.043909                    | -6.1 <sup>[a]</sup>  |
| CH <sub>3</sub> NH <sub>2</sub>                | -95.59384                   | 0.06403                   | 0.06840                     | -23.5 <sup>[b]</sup> |
| CH <sub>3</sub> NO <sub>2</sub>                | -244.478482                 | 0.049842                  | 0.055138                    | -81.0 <sup>[b]</sup> |
| CH <sub>3</sub> N <sub>3</sub>                 | -203.60768                  | 0.05025                   | 0.05567                     | 296.5 <sup>[a]</sup> |
| NH <sub>2</sub> NH <sub>2</sub>                | -111.5836915                | 0.05331                   | 0.057521                    | 95.4 <sup>[b]</sup>  |
| NH <sub>3</sub>                                | -56.4154647                 | 0.034384                  | 0.038203                    | -45.9 <sup>[b]</sup> |
| CH <sub>4</sub>                                | -40.3796220                 | 0.044793                  | 0.048605                    | -74.6 <sup>[b]</sup> |
| 1,2,3-2H-triazole                              | -241.63672                  | 0.05903                   | 0.06358                     | 267.6 <sup>[a]</sup> |
| 1,2,4-1H-triazole                              | -241.6632438                | 0.059886                  | 0.064393                    | 192.7 <sup>[b]</sup> |
| 4-nitramino-5-nitro-1,2,3-2H-triazole          | -705.0431379                | 0.09203                   | 0.07823                     | 302.4                |
| 2-methyl-4-amino-5-nitro-1,2,3-2H-triazole     | -540.1730305                | 0.106545                  | 0.116537                    | 208.2                |
| 2-methyl-4-nitramino-5-nitro-1,2,3-2H-triazole | -744.2420841                | 0.108862                  | 0.121272                    | 268.5                |
| 4-azido-5-nitro-1,2,3-2H-triazole              | -608.9727498                | 0.065215                  | 0.07471                     | 602.4                |
| 2-methyl-4-azido-5-nitro-1,2,3-2H-triazole     | -648.1716397                | 0.092575                  | 0.103906                    | 568.6                |
| 2-amino-4-azido-5-nitro-1,2,3-2H-triazole      | -664.1671349                | 0.081087                  | 0.092307                    | 670.8                |
| 2-methyl-4,5-dinitro-1,2,3-2H-triazole         | -689.0234399                | 0.091674                  | 0.103094                    | 240.2                |
| 2-amino-4,5-dinitro-1,2,3-2H-triazole          | -705.0185478                | 0.080331                  | 0.091534                    | 343.6                |
| 2-amino-3,5-dinitro-1,2,4-1H-triazole          | -705.0372789                | 0.080597                  | 0.091386                    | 286.7                |

<sup>[a]</sup> Data from NIST Chemistry WebBook. <sup>[b]</sup> Data calculated with the G2 method by using the Gaussian 03 program.
